# Supplementary material for: Growth Developmental Defects of Mitochondrial Iron Transporter 1 and 2 Mutants in Arabidopsis in Iron Sufficient Conditions
Source: Plants (Basel). 2023 Mar 4;12(5):1176. doi: 10.3390/plants12051176 (PMC10007191; doi:10.3390/plants12051176)
Supplement: Supplementary file 1 [file plants-12-01176-s001.zip]

Archive with 15 entries (15 files):
- Supplementary Figure S1 working.jpg
- Supplementary Figure S2 working.jpg
- Supplementary Figure S3 working.jpg
- supplementary figure S4 working.jpg
- Supplementary Figure S5 working.jpg
- Supplementary Figure S6 working.jpg
- Supplementary Figure S7 working.jpg
- Supplementary Figure S8 working.jpg
- Supplementary Table S1.pdf
- Supplementary Table S2.pdf
- Supplementary table S3.xlsx
- Supplementary table S4.xlsx
- Supplementary Table S5.xlsx
- Supplementary Table S6.xlsx
- Supplementary Table S7.xlsx
