# Supplementary material for: Growth Developmental Defects of Mitochondrial Iron Transporter 1 and 2 Mutants in Arabidopsis in Iron Sufficient Conditions
Source: Plants (Basel). 2023 Mar 4;12(5):1176. doi: 10.3390/plants12051176 (PMC10007191; doi:10.3390/plants12051176)
Supplement: Supplementary file 1 [file plants-12-01176-s001.zip › Supplementary Table S1.pdf]

Supplementary Table S1. List of primers used in this work

| Primer     | used for                                                               | Orientation | Primer (5'-3')                                                        |
|------------|------------------------------------------------------------------------|-------------|-----------------------------------------------------------------------|
| 1          | Amplification of <i>ADH1</i> promoter                                  | Forward     | AGCGGATAACAATTTACACAGGAAACAGCTAGGCGCATGCAACTTCTTTTC                   |
| 2          | Amplification of <i>ADH1</i> promoter to be fused to <i>MIT2</i> cds   | Reverse     | TTTGGGTACGGTTGTAGCCTCCGTAGCCATCATATGTATATGAGATAGTTGATTGTATGCTTGGTATAG |
| 3          | Amplification of <i>ADH1</i> promoter to be fused to <i>MIT1</i> cds   | Reverse     | TGGGAATTTGGTTGTTGCTTCTGTTGCCATCATATGTATATGAGATAGTTGATTGTATGCTTGGTATAG |
| 4          | Amplification of <i>MIT2</i> cds                                       | Forward     | ATGGCTACGGAGGCTACAAC                                                  |
| 5          | Amplification of <i>MIT2</i> cds                                       | Reverse     | TCAGGCAGTGTTTGAATCGAC                                                 |
| 6          | Amplification of <i>MIT1</i> cds                                       | Forward     | ATGGCAACAGAAGCAACAACCA                                                |
| 7          | Amplification of <i>MIT1</i> cds                                       | Reverse     | TCAGCTGCGTTTGCTTCACCAT                                                |
| 8          | Amplification of <i>ADH2</i> terminator to be fused to <i>MIT2</i> cds | Forward     | GACTTCAATGTCGATTCAAACACTGCCTGATTTGTAATACGACTCACTATAG                  |
| 9          | Amplification of <i>ADH2</i> terminator                                | Reverse     | GGTAACGCCAGGGTTTTCCAGTCACGACGCCGGTAGAGGTGTGGTCAATAAG                  |
| 10         | Amplification of <i>ADH2</i> terminator to be fused to <i>MIT1</i> cds | Forward     | GATCTCAATGGTGAAGCAAACGCAGCTTGATTTGTAATACGACTCACTATAG                  |
| 11         | Genotyping of <i>mit2</i> mutants and <i>MIT2</i> expression by RT-PCR | Forward     | TTGCAGATGGGTGAAGGGAC                                                  |
| 12         | Genotyping of <i>mit2</i> mutants and <i>MIT2</i> expression by RT-PCR | Reverse     | GCAGGATCCTCAAGAGTGTGA                                                 |
| LBb1.3     | Genotyping of SALK mutants                                             | -           | ATTTTGCCGATTTCGGAAC                                                   |
| LB1sail    | Genotyping of <i>mit2-2</i> mutant                                     | -           | GCCTTTTCAGAAATGGATAAATAGCCTTGCTTCC                                    |
| RB         | Characterization of T-DNA insertion in <i>mit2-1</i>                   | -           | TGGAACGTCAGTGGAGCATT                                                  |
| 13         | Genotyping of <i>mit1</i> mutants and <i>MIT1</i> expression by RT-PCR | Forward     | GTCATTTCTCCAATCTTCTCGG                                                |
| 14         | Genotyping of <i>mit1</i> mutants and <i>MIT1</i> expression by RT-PCR | Reverse     | CTGTTTCATAAGTGGACCAGC                                                 |
| 15         | Genotyping of <i>mit1</i> mutants and <i>MIT1</i> expression by RT-PCR | Forward     | TCTCCAATCTTCTCGGAACCC                                                 |
| 16         | Genotyping of <i>mit1</i> mutants and <i>MIT1</i> expression by RT-PCR | Reverse     | AGCATGCTCAGGCAACATCT                                                  |
| 17         | <i>MIT2</i> expression by RT-PCR                                       | Forward     | AGATAATGTAGTCCACCACCACAC                                              |
| 18         | <i>MIT2</i> expression by RT-PCR                                       | Reverse     | AAGAAAAGCAGGATCCTCAAGAGT                                              |
| 19         | <i>MIT2</i> expression by RT-qPCR                                      | Forward     | TGCAATGTCAGGGTGTGTGT                                                  |
| 20         | <i>MIT2</i> expression by RT-qPCR                                      | Forward     | ATGTCAGGGTGTGTGTGGAT                                                  |
| 21         | <i>MIT2</i> expression by RT-qPCR                                      | Reverse     | CGGGAGCCATCCCCTTAGAA                                                  |
| At4g24550F | Clathrin adaptor expression by RT-qPCR                                 | Forward     | AATACGCGCTGAGTTCCCTT                                                  |
| At4g24550R | Clathrin adaptor expression by RT-qPCR                                 | Reverse     | AGCACCGGGTTCTAACTCAA                                                  |
| At4g34270F | TIP41-like expression by RT-qPCR                                       | Forward     | GCCAAGCTCATGGTTCCTCC                                                  |

|            |                                    |         |                        |
|------------|------------------------------------|---------|------------------------|
| At4g34270R | TIP41-like expression by RT-qPCR   | Reverse | TGCCTCATCTTCGCCAAACC   |
| At2g21640F | UPOX expression by RT-qPCR         | Forward | AATCGAAACCGAGAACCCGC   |
| At2g21640R | UPOX expression by RT-qPCR         | Reverse | GGTTTGCAAAGAAAGTGGCGT  |
| At5g09570F | MSM1 expression by RT-qPCR         | Forward | CTCAGCCTAGTAGCGGTGGT   |
| At5g09570R | MSM1 expression by RT-qPCR         | Reverse | GCAGTTCCAGTACCCCAAGC   |
| At3g22370F | <i>AOX1A</i> expression by RT-qPCR | Forward | GGAATCGCGAGCTATTGGGG   |
| At3g22370R | <i>AOX1A</i> expression by RT-qPCR | Reverse | ACGTTTCCCATGGCCTGAAA   |
| At4g19690F | <i>IRT1</i> expression by RT-qPCR  | Forward | CAAATGCACAGCTCTTGCGA   |
| At4g19690R | <i>IRT1</i> expression by RT-qPCR  | Reverse | AATCCAATGACCACCGAGTGAA |
| At1g01580F | <i>FRO2</i> expression by RT-qPCR  | Forward | GGTTATGGTGTGCGGAGGAA   |
| At1g01580R | <i>FRO2</i> expression by RT-qPCR  | Reverse | TTTCCTTTTGGCTTGTGGCG   |

Start and stop codons are underlined
